1 **Title:** Improvements in diarrheal disease prevalence with point-of-use water filter implementation in the  
2 informal settlement of Kibera, Kenya

3 **Authors:** Nathan L. Tintle, Jason Westra, Kristin Van De Griend, Virginia Beard, Benjamin N. Turner,  
4 Natalie L.H. Huisman, Nicholas Dawson, Lillian Droscha, Clay Ihle, Matthew Moore, Marilyn Orellana,  
5 Luke Schutter, Lydia Snyder, Devin White, Makayla Wilson, Grace K. Goszkowicz, Brent P. Krueger,  
6 Aaron A. Best

7 **Author Information:**

8 Nathan L. Tintle: Aquora Research and Consulting, LLC; Department of Population Health Nursing  
9 Science, College of Nursing, University of Illinois Chicago, Chicago, IL; [ntintle@uic.edu](mailto:ntintle@uic.edu)

10 Jason Westra: Aquora Research and Consulting, LLC; [jason.westra@aquorarc.com](mailto:jason.westra@aquorarc.com)

11 Kristin Van De Griend: Aquora Research and Consulting, LLC; Department of Community and Public  
12 Health, Idaho State University, Pocatello, ID; [kristinvandegrien@isu.edu](mailto:kristinvandegrien@isu.edu)

13 Virginia Beard: Department of Political Science, Hope College, Holland, MI; [beard@hope.edu](mailto:beard@hope.edu)

14 Benjamin N. Turner: Global Water Research Institute, Hope College, Holland, MI; [turner@hope.edu](mailto:turner@hope.edu)

15 Natalie L.H. Huisman: Global Water Research Institute, Hope College, Holland, MI;  
16 [huismann@hope.edu](mailto:huismann@hope.edu)

17 Nicholas Dawson: Global Water Research Institute, Hope College, Holland, MI;  
18 [nicholas.dawson@hope.edu](mailto:nicholas.dawson@hope.edu)

19 Lillian Droscha: Global Water Research Institute, Hope College, Holland, MI; [ldroscha@bu.edu](mailto:ldroscha@bu.edu)

20 Clay Ihle: Global Water Research Institute, Hope College, Holland, MI; [clay.ihle@hope.edu](mailto:clay.ihle@hope.edu)

21 Matthew Moore: Global Water Research Institute, Hope College, Holland, MI;  
22 [matthew.moore.1@hope.edu](mailto:matthew.moore.1@hope.edu)

23 Marilyn Orellana: Global Water Research Institute, Hope College, Holland, MI;

24 [marilyn.orellana@hope.edu](mailto:marilyn.orellana@hope.edu)

25 Luke Schutter: Global Water Research Institute, Hope College, Holland, MI; [luke.schutter@hope.edu](mailto:luke.schutter@hope.edu)

26 Lydia Snyder: Global Water Research Institute, Hope College, Holland, MI; [lydia.snyder@hope.edu](mailto:lydia.snyder@hope.edu)

27 Devin White: Global Water Research Institute, Hope College, Holland, MI; [devin.white@hope.edu](mailto:devin.white@hope.edu)

28 Makayla Wilson: Department of Political Science, Hope College, Holland, MI;

29 [makayla.wilson@hope.edu](mailto:makayla.wilson@hope.edu)

30 Grace K. Goszkowicz: Aquora Research and Consulting, LLC; [grace.goszkowicz@aquorarc.com](mailto:grace.goszkowicz@aquorarc.com)

31 Brent P. Krueger: Aquora Research and Consulting, LLC; Global Water Research Institute and

32 Department of Chemistry, Hope College, Holland, MI; [brent.krueger@aquorarc.com](mailto:brent.krueger@aquorarc.com)

33 Aaron A. Best: Aquora Research and Consulting, LLC; Global Water Research Institute and Department

34 of Biology, Hope College, Holland, MI; [aaron.best@aquorarc.com](mailto:aaron.best@aquorarc.com)

35 **Corresponding Author:** Nathan L. Tintle, [ntintle@uic.edu](mailto:ntintle@uic.edu)

36 **Target Journal:** Tropical Medicine and Health

## 37 **Abstract**

38 *Background* There is increasing evidence of the efficacy of point-of-use water filters on diarrhea  
39 prevalence in numerous global settings, in both observational studies and randomized experiments. Most  
40 studies, however, are focused on rural locations. Methods We use self-report household surveys to  
41 monitor a set of approximately 10,000 households receiving point-of-use water filters and WASH training  
42 in Kibera, Kenya. Twenty-five drinking water sources throughout the 7 neighborhoods were also selected  
43 for testing of E. coli, total coliform, bacterial 16S rRNA community sequencing and metals. Albendazole  
44 was provided to all households at distribution as part of the standard filter distribution protocol, with a

45 subset of 2,642 households not receiving Albendazole at distribution, instead receiving it at the second  
46 follow-up (approximately 5 weeks after filter distribution).

47 *Results* After data cleaning, a sample of 6,795 households were analyzed using mixed effects generalized  
48 linear models to account for repeated household measurements, geospatial and temporal effects,  
49 interviewer and other household covariates. Models predicted self-reported, 2-week prevalence of  
50 diarrhea. After accounting for confounding factors, self-reported diarrhea rates dropped from 52.7% to  
51 2.2% after approximately 70 days of filter use. Field testing characterized most water sources (18 out of  
52 25) as unsafe for Total coliforms, many for E. coli (6 out of 25), and one source above WHO health  
53 guidelines for arsenic. There was no evidence of a difference in self-reported diarrhea prevalence between  
54 households receiving Albendazole at distribution vs. those that didn't ( $p > 0.05$ ).

55 *Conclusions* The introduction of Sawyer filters to households in a densely populated informal settlement  
56 reduced diarrhea and other health related problems. Representative water quality testing indicates a high  
57 frequency of drinking water source contamination with E. coli and Total Coliforms but a very low  
58 frequency of dissolved metals present, above WHO guidelines for drinking water. Anti-parasitic  
59 medication distribution had little to no impact on the results. Future randomized controlled studies with  
60 objective health measures are needed to ensure cause-effect impact of the filters, and study of filter  
61 longevity in the field continues to be a critical need.

62 **Keywords** diarrhea; drinking water; filter; epidemiology; water testing

### 63 **Background**

64 Globally, diarrhea was associated with an estimated 1.45 million deaths (1). More than 2 billion people  
65 use feces-contaminated drinking water sources, and nearly half a million deaths annually are associated  
66 with microbial contamination in drinking water (2). According to the World Health Organization (WHO),  
67 there are 1.7 billion cases of childhood diarrheal disease annually and 525,000 children under 5 die from  
68 the disease each year, making diarrheal disease the second leading cause of death in children under 5 (3).

69 Since a major source of diarrhea is fecal pathogens via fecal-oral transmission (4,5) these lives could have  
70 been saved through clean drinking water (2) and proper hand hygiene (5,6).

71 The global development community invests billions of dollars each year in interventions to promote  
72 access to adequate clean water around the world (7), though only 45% of countries are on target to reach  
73 their national drinking-water targets (8). Despite global spending, interventions often underperform their  
74 targeted goals or are unsustainable, with 30–50% of water, sanitation, and hygiene (WASH) projects  
75 failing after 2–5 years (9). Clasen et al. (10) found that, while interventions are generally successful in  
76 preventing diarrhea, there is significant heterogeneity across studies.

77 The most often implemented water interventions in communities include Point-of-Use (POU) filters  
78 placed in households and Point-of-Collection (POC) or Point-of-Entry (POE) filters. POC/POE filters are  
79 not as effective as POU filters due to inconsistency in the availability of needed reliable supply chains and  
80 appropriate community level management (10,11). One POU option is the Sawyer PointONE® water  
81 filter. Laboratory tests with the Sawyer PointONE® water filter suggest it aligns with the United States  
82 Environmental Protection Agency standard for bacteria and protozoa removal (12). Prior studies have  
83 identified a significant decrease in diarrhea prevalence (12,13). Some studies have argued that filters in  
84 the field have been fouled and under-utilized in practice (14) (15), however, others have noted numerous  
85 limitations of these studies (16) and reasonably good performance at removing *E. coli* and coliforms over  
86 a one- to three-year period in the field (17). Thus, there is a continued need for carefully designed field  
87 trials to evaluate the efficacy of Sawyer PointONE® and other hollow fiber membrane filters. Nearly all  
88 prior studies have focused on the Sawyer PointONE® and other similar filters in rural contexts. There is a  
89 need for efficacy evaluation in urban contexts.

90 Currently, efforts are underway to bring Sawyer PointONE® filters to each household in the  
91 approximately 250,000-person informal settlement of Kibera, located within Nairobi, Kenya. Kibera is  
92 the largest such settlement in Africa (18). The following is a 90-day prospective analysis of self-reported

93 diarrhea with parallel field and laboratory-based source water tests on approximately 10,000 households  
94 in Kibera.

## 95 **Methods**

### 96 *Data collection*

97 Data were collected as part of a larger campaign to install Sawyer International Bucket System® (19)  
98 water filters throughout an approximately 250,000-person informal settlement (Kibera), located within  
99 Nairobi, Kenya. Interviewers were trained by The Bucket Ministry (TBM) in conjunction with Aquora  
100 Research and Consulting, LLC (Aquora) on data collection procedures. Aquora researchers participated in  
101 onsite training in Kibera in November 2021, with a follow-up visit in March 2022 to ensure compliance  
102 with field protocols. Visits included embedding with randomly selected interviewers, as well as with  
103 interviewers identified with aberrant survey data, to improve compliance. Neighborhoods were canvased  
104 by TBM and community members were invited to distribution events of approximately 500 households  
105 (range: 60-1050). At distribution events, all households were provided a filter for their home (one per  
106 household), baseline survey data were collected, group trainings were conducted on proper filter use and  
107 basic hand washing, and individuals receiving filters were required to demonstrate filter cleaning via  
108 backflushing. Data collectors visited each home with scheduled visits at 7-10 days, 30-45 days and 60-90  
109 days after filter distribution. To build trust, the same data collector was scheduled to conduct all three  
110 follow-up visits with assigned households. Over 100 data collectors were active in the field throughout  
111 the course of the study. Data collection procedures were approved by the Institutional Review Board at  
112 Dordt University (a federally compliant IRB: FWA00028884), by contract with Aquora.

### 113 *Survey*

114 All household residents 18 years of age and older were eligible to participate and informed consent was  
115 received prior to participation. Receiving a filter was not contingent upon participating in the survey. A  
116 single household resident answered questions on behalf of the entire household. The surveys (baseline

117 and follow-up) were developed by Aquora to maximize scientific rigor (valid and reliable measures),  
118 simplicity and minimize time in the field. Multiple rounds of input from stakeholders yielded preliminary  
119 surveys which were then forward and back-translated into Swahili/English by two separate leaders of the  
120 field data collection teams. Back-translation yielded minor translation inconsistencies which were then  
121 addressed with the translators yielding two reliably translated surveys. Initial training on the surveys and  
122 pilot testing in mid-November 2021 identified additional minor survey implementation questions which  
123 were addressed in the field before roll-out of the final version of the survey in late 2021.

#### 124 *Survey contents and measures*

125 Surveys were developed to address the following: basic household demographics (e.g., gender, age,  
126 number of household members, job status, school status), where household water is typically obtained,  
127 how much money is typically spent on water, self-reported diarrhea (two-weeks), self-reported impact of  
128 diarrhea on school/work participation (two weeks), medical costs (previous month), self-reported other  
129 health issues (two weeks) and self-reported hand washing. Follow-up surveys also included measures of  
130 filter utilization (i.e., how often filter buckets are refilled) and interviewer perceptions of filter  
131 utilization/functionality/user ability to clean the filter. At the time of follow-up surveys, if interviewers  
132 perceived a lack of knowledge or understanding of filter utilization and/or hand washing among  
133 respondents, interviewers retrained the respondents. In addition to the previous questions, as part of TBM  
134 organizational practices, a separate set of faith-based questions were asked of respondents after all other  
135 questions, but before the interviewer left the home. Respondents were informed that responses to these  
136 separate questions in no way impacted their eligibility to participate in the filter program.

#### 137 *Sample*

138 The target sample was 10,000 households with data collection beginning in late November, 2021 after in-  
139 field training and quality assurance were completed. Data collection ended July 3, 2022 after the last of  
140 the initial 10,000 households completed their third follow-up. Data was collected in 7 neighborhoods in

141 Kibera. By design, this report covers the initial 10,000 households, though data collection continues  
142 across the remaining ~90,000 households as part of the Kibera-wide implementation project being  
143 conducted by TBM.

#### 144 *Water testing*

145 Water source samples were collected in the seven neighborhoods of Kibera that were included in  
146 distribution and follow-up surveys as part of this study and were selected to represent typical drinking  
147 water sources that are used daily in Kibera. In addition, ad hoc testing of the river that runs through  
148 Kibera and other sources that could be used as drinking water was conducted, though, to our knowledge,  
149 these are not currently used as drinking water sources. For each water source tested, three, ~20L samples  
150 were collected in portable containers after rinsing with source water. Tandem filter kits were used to test  
151 each water source. The kits included 1) one Aquagenx CBT EC + TC (Compartment Bag Test) Most  
152 Probable Number (MPN) kit (20) for in-field *E. coli* and Total Coliform testing, 2) three tandem filter  
153 assemblies for collection of full bacterial communities for 16S rRNA sequencing, and 3) three metal  
154 testing kits for collection of water for ICP-MS analysis at a certified testing laboratory in the United  
155 States. These tandem filter kits are designed to test three, independent replicates of each water source,  
156 with the exception of the single in-field EC + TC test. Tests were conducted by Aquora personnel or local  
157 TBM team members who were trained in the field by Aquora personnel according to protocols developed  
158 specifically for this testing approach (21). Information about each water source and testing procedure,  
159 including EC + TC testing results, were recorded using FastField Forms or ArcGIS Survey123® mobile  
160 device apps in real time. All testing forms were developed by Aquora. Tandem filter kits used for water  
161 sources were transported back to the United States either in airline luggage or shipped via FedEx. Upon  
162 receipt in the laboratory, tandem filter assemblies were stored at -80°C until processing; metals testing  
163 kits were acidified and submitted to ALS Environmental, Holland, MI for testing of Arsenic, Barium,  
164 Cadmium, Chromium, Copper, Lead, Nickel and Selenium. Metals results were compared to WHO  
165 guidelines for metal concentration limits in drinking water. Test results for EC + TC were analyzed to

166 verify accuracy of in-field test interpretation by comparison of recorded results to photographs of the test  
167 kits. These validated results were translated to MPN concentrations (cells/100 mL) and assigned to WHO  
168 Health Risk Categories based on MPN. Tandem filter assemblies were processed to recover bacteria  
169 filtered from source water by individually backflushing A filters (capturing source water bacteria) and B  
170 filters (control for each replicate). Total genomic DNA was extracted from backflushed material for  
171 downstream sequencing of 16S rRNA bacterial genes. Library preparation and QA/QC were performed  
172 according to the Schloss Lab MiSeq Wet Lab SOP (22) and sequenced using Illumina MiSeq 2x250 bp v2  
173 paired end sequencing according to manufacturer instructions. Data processing of 16S rRNA sequenced  
174 libraries was conducted on a high-performance computing cluster using the Schloss Lab MiSeq SOP  
175 mothur (23). Data analyses were conducted using custom R (24) scripts to assess bacterial community  
176 profiles and determine presence/absence of 18 bacterial genera known to contain waterborne pathogen  
177 species (*Acinetobacter*, *Aeromonas*, *Burkholderia*, *Campylobacter*, *Enterobacter*, *Escherichia/Shigella*,  
178 *Francisella*, *Helicobacter*, *Klebsiella*, *Legionella*, *Leptospira*, *Mycobacterium*, *Pseudomonas*,  
179 *Salmonella*, *Staphylococcus*, *Tsukamurella*, *Vibrio*, and *Yersinia*) (25). Sequencing data are publicly  
180 available via the NCBI Short Read Archive (SRA) under project accession number PRJN939352  
181 (<https://www.ncbi.nlm.nih.gov/bioproject/939352>). In addition, custom R scripts were implemented to  
182 summarize EC + TC data, metals data, and water source metadata. Individual water quality dashboards  
183 were produced for each water source, summarizing the three data types and general water source  
184 descriptions captured through in-field surveys.

#### 185 *Data cleaning*

186 Despite numerous internal validation checks built into the survey instrument, and automatic scheduling of  
187 follow-ups, substantial data cleaning was necessary to yield a high-quality dataset ready for analysis.  
188 First, early in the project, data heterogeneity by interviewer was observed. Notably, response patterns by  
189 interviewer suggested that interviewers were not consistently implementing the field protocols. Aquora  
190 coordinated with TBM and field managers in Kibera to generate lists of interviewers who the data



191 suggested were not consistently implementing field protocols. These interviewers were then observed in  
192 the field and received retraining. This process continued for the remainder of the project.

193 Second, early in the project, surveyor data suggested that data collection tablets and/or login IDs were  
194 shared between interviewers, which made tracking and identifying surveyors challenging. Again,  
195 retraining occurred for quality improvement. To address both data limitations, data from collectors who  
196 generated health outcomes in the top 5% or bottom 5% prevalence (e.g., very high or very low levels of  
197 reported health outcomes) were eliminated from the dataset prior to any of the following analysis.

198 Third, despite a scheduling system, there were substantial differences in the time at which surveys took  
199 place. Ideally, follow-up surveys took place at 7-10 days, 30-45 days, and 60-90 days, however, there  
200 were substantial deviations from this ideal distribution. To address this issue and ensure meaningful  
201 interpretation of results, we emphasize *days since baseline* instead of follow-up number, for most of the  
202 graphs/statistical models utilized in this report.

203 Finally, there were numerous other observed data inconsistencies, including (a) varying household sizes  
204 reported over time, (b) very large household sizes reported (e.g., 30+), (c) unclear survey responses, (d)  
205 surveys with substantial amounts of missing data, (e) locations mapped more than 5 miles from Kibera,  
206 (f) duplicate filter IDs, (g) extreme values (more than 4SD) for work or school missed, (h) follow-up  
207 dates recorded before distribution dates, and (i) surveys with interviewer notes that suggested poor data  
208 quality. Surveys with poor quality and/or high levels of missing data were eliminated from subsequent  
209 analyses.

210 To ensure that households being tracked were consistent over the course of this longitudinal study, data  
211 from households were only included for analysis if data were available at both distribution and at least  
212 one follow-up (e.g., households for which distribution data was deemed inaccurate were dropped from  
213 both distribution and follow-up analyses). After data cleaning, the total number of surveys available for

214 analysis was 25,208, with 6,795 distribution surveys and 18,413 follow-up surveys ranging from 1 to 203  
215 days post-distribution (see Table 1).

216 **Table 1. Data available for analysis after data cleaning to improve data quality and validity**

| Time point        | Distribution | Follow-up #1 | Follow-up #2 | Follow-up #3 | Total surveys |
|-------------------|--------------|--------------|--------------|--------------|---------------|
| Surveys available | 6,795        | 6,255        | 6,153        | 6,005        | 25,208        |

217  
218 *Anti-parasitic medication substudy*

219 A small substudy was designed to attempt to isolate filter and WASH effects from the distribution of anti-  
220 parasitic medication on self-reported health. To ensure sufficient statistical power, ensure ethical  
221 treatment of participants and feasibility for field teams, while accomplishing the overall study goals, we  
222 determined that anti-parasitic medication would not be distributed at baseline or the first follow-up for  
223 distributions over a one-month period. Instead, anti-parasitic medication was distributed at the second  
224 follow-up visit for this subset of households.

225 In early March 2022, U.S. based team members traveled to Kibera to train data collectors/field teams on  
226 the new protocol, as well as to embed with field teams to ensure consistent implementation of all aspects  
227 of the substudy and the overall study. During March 2022, distributions to N=2642 households did not  
228 receive anti-parasitic medications until the second follow-up time point (approximately 5 weeks after  
229 filter distribution).

230 *Statistical methods*

231 To correctly model the longitudinal nature of the data, and account for numerous sources of confounding,  
232 generalized, linear (or logistic) mixed effects models were used. Random effects were included in the  
233 model to account for the repeated measures nature of the data with regard to both households and  
234 interviewers (two random effect terms). Fixed effects (covariates) were included in the model to account  
235 for numerous sources of potential confounding: (a) household size, (b) seasonality (fixed effect for each

236 month), (c) filter installed (yes/no), (d) neighborhood, (e) knowledge of WASH practices and (f) filter  
237 use. Separate models were fit for each different health and economic outcome. Similar models were fit for  
238 filter utilization, removing filter installation and filter use from the covariates list.

239 Results provided in this report focus on graphs of adjusted health, economic impact and utilization rates –  
240 accounting for covariates and mixed effects, and after data cleaning. Ninety-five percent confidence  
241 bands are included on all graphs. Nearly all results shown are statistically significant ( $p < 0.001$ ) with non-  
242 significant differences noted in the text. Covariate adjusted prevalence estimates on the graphs are  
243 obtained by selecting median levels of covariates. Figures provided use two week-categories to obtain  
244 (unsmoothed) estimates. Assessment of the impact of anti-parasitic medication was made by adding a  
245 term to the model to represent when medication was distributed.

## 246 **Results**

### 247 *Sample*

248 Table 2 provides a general overview of the 6,795 households at baseline. Most households were multi-  
249 member (average 4 members), and most had children (<18 years) living in the household (77.4%). Hand-  
250 washing was reported to be typical after defecation and before eating/food prep. All surveys were  
251 administered between November and April, in seven zones in Kibera. Follow-up surveys were completed  
252 between 2 and 16 weeks after baseline (2 weeks: 5,915 surveys; 4 weeks: 4,801 surveys; 6 weeks: 2,720  
253 surveys; 8 weeks: 3,951 surveys; 10-16 weeks: 655 surveys).

254 *Table 2. Sample Characteristics at baseline*

| <b>Characteristics</b>                 | <b>Percent (x/N) or Mean (SD)</b> |
|----------------------------------------|-----------------------------------|
| Household size (persons)               | 3.99 (1.68)                       |
| Baseline self-report hand washing...   |                                   |
| ...after defecation                    | 97.2% (6604/6795)                 |
| ...before eating                       | 98.4% (6686/6795)                 |
| ...before food preparation             | 88.1% (5986/6795)                 |
| Children (<18 years) live in household | 77.4% (5259/6795)                 |
| Month                                  |                                   |
| November                               | 8.5% (580/6795)                   |

|             |                   |
|-------------|-------------------|
| December    | 0.3% (18/6795)    |
| January     | 23.2% (1576/6795) |
| February    | 20.7% (1406/6795) |
| March       | 33.7% (2292/6795) |
| April       | 13.6% (923/6795)  |
| Kibera zone |                   |
| Ayany       | 12.9% (878/6795)  |
| Fort        | 10.6% (722/6795)  |
| Karanja     | 6.1% (414/6795)   |
| Kianda      | 8.6% (587/6795)   |
| Olympic     | 0.4% (27/6795)    |
| Raila       | 43.4% (2946/6795) |
| Soweto      | 18.0% (1221/6795) |

255

### 256 *Filter utilization and functioning*

257 After accounting for covariates (e.g., seasonality; interviewer; see methods), approximately 97.2% of  
258 participants report having a functioning filter and using it within 6-weeks of distribution (see Fig 1). The  
259 observed increasing trend likely indicates positive impact of follow-up visits on retraining, ensuring parts  
260 are available and building confidence in the utility of the filter for participants.

261

### 262 **Fig. 1. Model adjusted estimates of filter utilization<sup>a</sup>**

263 <Insert Figure 1 about here>

264 <sup>a</sup> 95% confidence interval bands shown in gray

265

### 266 *Health impacts*

267 Self-reported two-week diarrhea prevalence dropped substantially from baseline to 10-weeks, with the  
268 largest drop observed between 2 and 4-weeks, reaching its lowest values, and maintaining these levels,  
269 after 6 weeks. Diarrhea prevalence decreased overall (Fig 2A), and within all age brackets (Fig. 2B-D),  
270 with covariate adjusted estimates of decreased 2-week prevalence of approximately 20-fold across all  
271 ages after 6 weeks.

272

273 **Fig. 2. Model adjusted estimates of Diarrhea Prevalence**

274 <Insert Figure 2 about here>

275 **A** Household diarrhea prevalence (at least one member) **B** Adult (aged 18+) diarrhea prevalence **C** School-aged child 9aged 5-  
276 17) diarrhea prevalence **D** Young child (aged 4 and under) diarrhea prevalence

277

278 Similar patterns, though with lower overall prevalence, were observed for more severe diarrhea and other  
279 reported health problems (Fig. 3).

280

281 **Fig. 3. Severe Diarrhea and other health impacts**

282 <Insert Figure 3 about here>

283 **A** Severe diarrhea (caused the individual to miss work) among adults **B** Severe diarrhea (caused the individual to miss school)  
284 among children **C** Other health issues

285

286 *Economic impact*

287 Participants were also asked about their previous 30-day household medical and water costs. For  
288 households that previously self-reported diarrhea, medical expenses trended downward after filter  
289 distribution (Fig. 4A). There was no reduction in household water costs over time ( $p>0.05$ ) (Fig. 4B). The  
290 lack of observed association between filter distribution and water costs could be explained by team  
291 member observation and documentation that drinking water in Kibera, regardless of quality, is sold from  
292 water distributors who control (illegal) taps.

293

294 **Fig. 4. Economic Impact of intervention over time**

295 <Insert Figure 4 about here>

296 **A** 30-day medical costs (Ksh) **B** 30-day water costs (Ksh)

297

298 *Impact of anti-parasitic medication*

299 A subset of households were given anti-parasitic medication later than other households (see Methods).  
300 There was no statistically significant difference in self-reported diarrhea between households that were  
301 given delayed anti-parasitic at any point in the study (Fig. 5;  $p > 0.05$  at all time points and overall).

302

303 **Fig. 5. Self-reported diarrhea prevalence by anti-parasitic medication group**

304 <Insert Figure 5 about here>

305

306 *Impacts of WASH training*

307 Attempts to isolate the effects of WASH training from filter implementation were unsuccessful, because  
308 nearly all households utilized the filters ( $> 97\%$  after six weeks, see Fig. 1). Self-reported hand washing  
309 rates suggest that WASH training had a small (though not statistically significant) positive impact:  
310 individuals claimed to wash their hands after defecation (97.4% distribution; 98.3% follow-up), before  
311 eating (98.6% distribution; 98.5% follow-up) and before food prep (86.7% distribution; 92.6% follow-  
312 up).

313 *Water test results*

314 At the time of filter distribution, 25 water sources in distribution neighborhoods of Kibera were tested (21  
315 sources actively used for drinking water, 3 sources that could be used for drinking water, and 1 surface  
316 source that is not used for drinking, according to residents of Kibera). Samples were collected from the  
317 range of possible water source types for residents in these neighborhoods (Fig. 6) in November 2021,  
318 March 2022, and May 2022.

319

320 **Fig. 6. Distribution of water source types sampled in Kibera**

321 <Insert Figure 6 about here>

322

323 *Results of Bacterial Testing*

324 Results from in-field testing of *E. coli* and Total Coliform concentrations show that most water sources  
 325 available to residents of Kibera pose a high risk of water-borne illness. “Unsafe” *E. coli* levels were found  
 326 in 6 water sources, according to WHO-categorization, while only 13 water sources fell into the “Low  
 327 Risk/Safe” *E. coli* categories (Fig. 7A). Furthermore, 18 water sources were categorized as “Unsafe” for  
 328 Total Coliforms with only 2 “Low Risk/Safe” (Fig. 7B). It is clear from these data that most water  
 329 sources contain bacterial contamination at levels that are unsafe for human consumption.

330

331 **Fig. 7. Field testing of water sources**

332 <Insert Figure 7 about here>

333 **A** Field testing of water sources for *E. coli* concentration. Aquagenx Compartment Bag EC+TC Most Probable Number tests  
 334 were conducted for all water sources sampled. Based on the determined MPN (cells/100 mL), each water source was categorized  
 335 into a WHO Health Risk category. The number of water sources in each category is depicted by the height of the bar for each  
 336 category. **B** Field testing of water sources for Total Coliform concentration. Aquagenx Compartment Bag EC+TC Most Probable  
 337 Number tests were conducted for all water sources sampled. Based on the determined MPN (cells/100 mL), each water source  
 338 was categorized into a WHO Health Risk category. The number of water sources in each category is depicted by the height of the  
 339 bar for each category.

340

341 Other potential pathogens associated with drinking water were identified in all water sources tested by  
 342 bacterial community sequencing (Table 3). This methodology allows for a more specific description of  
 343 potential health risks than the EC+TC MPN testing methods. Each of the bacterial genera listed are  
 344 known to cause either respiratory, gastrointestinal, or skin, eye and wound diseases transmitted through  
 345 contaminated water. All 24 water sources with sufficient sequencing read depth were observed to contain  
 346 at least three of the genera listed in the table. Water source 370, representing the river that runs through  
 347 Kibera and that is not used as a drinking water source, contained seven of the genera.

348 **Table 3. Presence or Absence of Potential Bacterial Pathogens<sup>a</sup>**

| Water Source | <i>Acinetobacter</i> | <i>Aeromonas</i> | <i>Campylobacter</i> | <i>Escherichia-Shigella</i> | <i>Legionella</i> | <i>Leptospira</i> | <i>Mycobacterium</i> | <i>Pseudomonas</i> | <i>Staphylococcus</i> | <i>Yersinia</i> |
|--------------|----------------------|------------------|----------------------|-----------------------------|-------------------|-------------------|----------------------|--------------------|-----------------------|-----------------|
|              |                      |                  |                      |                             |                   |                   |                      |                    |                       |                 |

|            |            |            |            |            |            |            |            |            |            |            |
|------------|------------|------------|------------|------------|------------|------------|------------|------------|------------|------------|
| <b>312</b> | <b>Yes</b> | <b>Yes</b> | No         | No         | <b>Yes</b> | No         | No         | <b>Yes</b> | No         | No         |
| <b>313</b> | No         | No         | No         | No         | <b>Yes</b> | No         | No         | No         | <b>Yes</b> | No         |
| <b>316</b> | <b>Yes</b> | <b>Yes</b> | No         | <b>Yes</b> | <b>Yes</b> | No         | <b>Yes</b> | <b>Yes</b> | No         | No         |
| <b>352</b> | <b>Yes</b> | No         | No         | No         | <b>Yes</b> | No         | No         | No         | <b>Yes</b> | No         |
| <b>364</b> | No         | <b>Yes</b> | No         | <b>Yes</b> | <b>Yes</b> | No         | <b>Yes</b> | No         | No         | No         |
| <b>365</b> | No         | <b>Yes</b> | No         | No         | <b>Yes</b> | No         | No         | <b>Yes</b> | No         | No         |
| <b>367</b> | No         | No         | No         | No         | <b>Yes</b> | No         | <b>Yes</b> | <b>Yes</b> | <b>Yes</b> | No         |
| <b>368</b> | No         | <b>Yes</b> | No         | No         | <b>Yes</b> | No         | <b>Yes</b> | No         | No         | No         |
| <b>369</b> | <b>Yes</b> | <b>Yes</b> | No         | No         | <b>Yes</b> | No         | No         | <b>Yes</b> | <b>Yes</b> | <b>Yes</b> |
| <b>370</b> | No         | <b>Yes</b> | No         | <b>Yes</b> | <b>Yes</b> | <b>Yes</b> | <b>Yes</b> | No         | <b>Yes</b> | <b>Yes</b> |
| <b>371</b> | <b>Yes</b> | No         | No         | No         | <b>Yes</b> | No         | No         | <b>Yes</b> | No         | No         |
| <b>373</b> | No         | <b>Yes</b> | <b>Yes</b> | <b>Yes</b> | No         | No         | No         | No         | No         | No         |
| <b>374</b> | No         | No         | No         | No         | <b>Yes</b> | No         | No         | No         | <b>Yes</b> | No         |
| <b>375</b> | No         | No         | No         | No         | <b>Yes</b> | No         | <b>Yes</b> | <b>Yes</b> | <b>Yes</b> | No         |
| <b>377</b> | No         | No         | No         | <b>Yes</b> | No         | No         | No         | <b>Yes</b> | <b>Yes</b> | No         |
| <b>389</b> | <b>Yes</b> | <b>Yes</b> | No         | No         | No         | No         | <b>Yes</b> | No         | <b>Yes</b> | No         |
| <b>391</b> | <b>Yes</b> | <b>Yes</b> | No         | No         | <b>Yes</b> | No         | No         | <b>Yes</b> | <b>Yes</b> | No         |
| <b>392</b> | No         | <b>Yes</b> | No         | No         | <b>Yes</b> | No         | <b>Yes</b> | No         | No         | No         |
| <b>394</b> | <b>Yes</b> | No         | No         | <b>Yes</b> | <b>Yes</b> | No         | <b>Yes</b> | No         | No         | No         |
| <b>397</b> | <b>Yes</b> | <b>Yes</b> | No         | No         | <b>Yes</b> | No         | No         | No         | No         | No         |
| <b>401</b> | <b>Yes</b> | <b>Yes</b> | No         | No         | No         | No         | No         | <b>Yes</b> | No         | No         |
| <b>402</b> | <b>Yes</b> | <b>Yes</b> | No         | <b>Yes</b> | <b>Yes</b> | No         | <b>Yes</b> | <b>Yes</b> | No         | <b>Yes</b> |
| <b>403</b> | <b>Yes</b> | No         | No         | No         | <b>Yes</b> | No         | <b>Yes</b> | <b>Yes</b> | No         | No         |
| <b>404</b> | <b>Yes</b> | <b>Yes</b> | No         | No         | No         | No         | No         | <b>Yes</b> | No         | No         |

349 <sup>a</sup>16S rRNA community sequencing of 24 water sources was used to identify the presence or absence of 18 bacterial  
 350 genera with known waterborne pathogenic species. Ten genera were identified amongst the samples tested. All samples contained  
 351 at least three genera. Presence is indicated as “Yes” and bolding.

352 The results from both *E.coli* + Total Coliform and the bacterial community testing support the high  
 353 baseline rates of diarrhea and potentially other waterborne health issues that were self-reported by  
 354 participants.

355 *Results of Dissolved Metals Testing*



356 To assess water quality for potential long term health effects, we tested all the sources sampled for the  
 357 presence of eight metals known to cause disease and for which the WHO sets out allowable limits in  
 358 drinking water. Metals testing of drinking water sources showed that all but one source had either  
 359 undetectable levels or detectable levels below WHO health guidelines (Table 4) (25). One drinking water  
 360 source (Source 374) showed arsenic levels above WHO health guidelines. Water source 374 is a borehole  
 361 drilled near a local hospital; the water is intended for use by the hospital, but it is also available as a free  
 362 source of water to the local community. It is estimated that this source serves around 70 people per day.  
 363 Water source 370 (river) showed chromium levels above WHO guidelines, but this source is not used for  
 364 drinking water.

365 **Table 4. WHO Above/Below health guidelines for metals in drinking water<sup>a</sup>**

| <b>Water Source</b> | <b>Arsenic</b> | <b>Barium</b> | <b>Cadmium</b> | <b>Chromium</b> | <b>Copper</b> | <b>Lead</b> | <b>Nickel</b> | <b>Selenium</b> |
|---------------------|----------------|---------------|----------------|-----------------|---------------|-------------|---------------|-----------------|
| <b>312</b>          | No             | No            | No             | No              | No            | No          | No            | No              |
| <b>313</b>          | No             | No            | No             | No              | No            | No          | No            | No              |
| <b>316</b>          | No             | No            | No             | No              | No            | No          | No            | No              |
| <b>352</b>          | No             | No            | No             | No              | No            | No          | No            | No              |
| <b>364</b>          | No             | No            | No             | No              | No            | No          | No            | No              |
| <b>365</b>          | No             | No            | No             | No              | No            | No          | No            | No              |
| <b>367</b>          | No             | No            | No             | No              | No            | No          | No            | No              |
| <b>368</b>          | No             | No            | No             | No              | No            | No          | No            | No              |
| <b>369</b>          | No             | No            | No             | No              | No            | No          | No            | No              |
| <b>370</b>          | No             | No            | No             | <b>Yes</b>      | No            | No          | No            | No              |
| <b>371</b>          | No             | No            | No             | No              | No            | No          | No            | No              |
| <b>372</b>          | No             | No            | No             | No              | No            | No          | No            | No              |
| <b>373</b>          | No             | No            | No             | No              | No            | No          | No            | No              |
| <b>374</b>          | <b>Yes</b>     | No            | No             | No              | No            | No          | No            | No              |
| <b>375</b>          | No             | No            | No             | No              | No            | No          | No            | No              |
| <b>377</b>          | No             | No            | No             | No              | No            | No          | No            | No              |
| <b>389</b>          | No             | No            | No             | No              | No            | No          | No            | No              |
| <b>391</b>          | No             | No            | No             | No              | No            | No          | No            | No              |

|     |    |    |    |    |    |    |    |    |
|-----|----|----|----|----|----|----|----|----|
| 392 | No | No | No | No | No | No | No | No |
| 394 | No | No | No | No | No | No | No | No |
| 397 | No | No | No | No | No | No | No | No |
| 401 | No | No | No | No | No | No | No | No |
| 402 | No | No | No | No | No | No | No | No |
| 403 | No | No | No | No | No | No | No | No |
| 404 | No | No | No | No | No | No | No | No |

366 <sup>a</sup>Water sources were tested for eight metals with regulatory guidelines from the WHO. Metals detected at concentrations above  
367 the WHO guidelines are indicated with “Yes” and bolding. A “No” indicates that metals were not detected at concentrations  
368 above the guidelines, however, it is possible that a metal was present but below the limits (not shown). One drinking water source  
369 (374) shows arsenic levels above the guidelines. Chromium is present in one water source (370), which is not used as drinking  
370 water source.

371

## 372 **Discussion**

373 The Sawyer filter, combined with WASH training, leads to reductions in self-reported diarrhea rates, and  
374 improvement in self-reported economic measures in Kibera at rates in line with those observed in non-  
375 urban contexts in prior studies (21). Filter utilization rates are high, as observed in other contexts, though  
376 utilization increases after the first follow-up visits with recipients. This outcome suggests that the group  
377 distribution model is effective, but that the first follow-up is critical for retraining and to ensure filter  
378 utilization. Finally, there was no measurable effect of adding anti-parasitic drugs along with the filter and  
379 WASH training. Attempts to further isolate filter effects from WASH training were unsuccessful due to  
380 the large percentage of filter utilization.

## 381 *Limitations*

382 While the study design and analysis of this study were carefully planned and implemented, there are  
383 limitations worth noting. First, this study is observational. Thus, the resulting associations are not  
384 necessarily causal. However, given (a) the prospective nature of the study and (b) the control of numerous  
385 covariates via the statistical modeling process, the resulting associations are strongly suggestive. Notably,  
386 however, randomized controlled trials are necessary to confirm the suggestive associations as truly causal.  
387 Second, this study is based on self-reports of health, economic and other outcomes. While self-reports of

388 health outcomes are generally valid and reliable, self-report can be substantially impacted by a variety of  
389 biases (interviewer, recall, etc.). Thus, the best way to view the associated results is (a) in light of other  
390 similar studies using self-reported measures (comparatively) and (b) in terms of relative changes in self-  
391 reported outcomes (e.g., 2-fold reduction, etc.). Caution should be used if attempting to utilize the data as  
392 true measures of absolute levels of disease or economic benefit. Third, to minimize interviewer time, a  
393 single member of the household was interviewed and reported on the health of the entire household. Thus,  
394 self-reported information is further confounded by the ability of the respondent to know and recall health,  
395 economic and utilization information for all individual household members.

396 Efforts were made to clean the data and we are assuming that missing data are approximately distributed  
397 at random. Efforts were made to separate questions related to filter utilization, health impacts and similar  
398 questions reported here from other survey questions and related discussion with surveyors about faith-  
399 based topics. However, there is no guarantee that order effects/carry-over effects from the discipleship  
400 process run by the interviewer are not impacting study findings.

401 The study was implemented over a 6-month period in Kibera (Nov 2021 – May 2022). While statistical  
402 models accounted for temporal effects, the 6-month period study means that seasonal cycles of rainy/dry,  
403 which can impact water access, cleanliness and related infectious disease cycles were only observed for 6  
404 months of a calendar year. Notably, however, the study period covered parts of two rainy seasons  
405 (Nov/Dec; Apr/May), as well as a dry season (Jan/Feb/Mar). Data were not collected during the winter  
406 dry season (Jun-Oct), which sees the coldest temperatures of the year and peak incidence of infectious  
407 diseases that typically spike in winter months (e.g., influenza).

408 Water quality testing was limited to 25 water sources in seven neighborhoods in Kibera. While this gives  
409 a representative sense of the types of water sources used, it was not designed to be a comprehensive study  
410 of water quality in the area. Sequencing of bacterial communities targeting the 16S rRNA gene limits  
411 identification of bacteria to the genus level. This allows for the identification of genera that are known to  
412 contain bacterial waterborne pathogens as members. However, this method is not a direct detection of

413 pathogens and should not be interpreted as such. Water quality testing of chemical contaminants was  
414 limited to dissolved metals. Other types of chemical contaminants found in urban environments were not  
415 tested (e.g., volatile organic chemicals (VOCs) associated with petroleum and other organics).

#### 416 *Implications*

417 Overall, diarrhea reduction was similar to that observed in other contexts, suggesting the effectiveness of  
418 the Sawyer PointONE® filter in an informal, urban settlement. Furthermore, in this context, filter  
419 distributions were done in a group format, which improves the efficiency and consistency of training and  
420 data collection. However, data analysis suggests that some households (~ 10%, see Fig. 1) are not using  
421 or receiving the filter benefits until after the first follow-up which occurs at the individual home with a  
422 single data collector who provides training. The group distribution model appears to hold promise (similar  
423 diarrhea reduction to what has been seen in other contexts), however, the need for more purposeful  
424 follow-ups in this model is worth noting and suggests further study of the economics of the group  
425 distribution model for organizations leading filter distribution efforts.

426 Bacteria were found in most samples, while only one drinking water source had a heavy metal concern.  
427 Overall, the results of bacteria and metals testing support the use of hollow-fiber membrane filters in  
428 Kibera and do not indicate the need for secondary level treatment to remove metals. The Sawyer  
429 PointONE® filter is designed to remove bacteria, as identified in the testing done here. These results  
430 underscore the need to conduct water source testing when choosing a filter technology, to ensure that the  
431 technology meets the needs of the sources being used for drinking water. Continued monitoring of water  
432 sources and the filters being used is required to ensure the appropriateness and effectiveness of the  
433 remediation solutions.

434 In this intervention, anti-parasitic medication distribution and WASH training also take place at the time  
435 of distribution, with repeated WASH training at follow-up visits as needed. Thus, health benefits should  
436 be attributed to a mix of the point of use filter, WASH training and anti-parasitic medication distribution.

437 However, we were able to separate out the impact of anti-parasitic medication on self-reported outcomes  
438 in a substudy. The anti-parasitic medication distribution showed little to no evidence of effect. One reason  
439 for this lack of impact may be due to the limited nature of the antiparasitic medication intervention. Due  
440 to Kenyan regulatory constraints, the distribution of antiparasitic medications consisted of only a single,  
441 low dose of Albendazole at baseline for most participants in the study (the substudy pushed the timing of  
442 this dose to the second follow-up). While the anti-parasitic substudy took place entirely in March to meet  
443 feasibility concerns of TBM, potentially confounding seasonal health effects with the treatment arm, no  
444 noticeable change in self-reported prevalence of diarrhea at baseline was observed before (February) or  
445 after (April) the substudy, making it unlikely to materially contribute to the findings observed here. We  
446 also note that the substudy on anti-parasitic drug treatment was analyzed with intent-to-treat analysis,  
447 which ignores whether or not individuals chose to take the anti-parasitic drug and at what time. Finally,  
448 we note that while randomized controlled trials (RCTs) remain the gold standard to attribute causality to  
449 interventions, practical concerns (feasibility; ethical) regarding implementing an RCT for the present  
450 study led to the implementation of the study protocol outlined here. Statistical adjustment of confounding  
451 variables, a straightforward field protocol, and oversight from the Aquora team mitigate many of the  
452 potential limitations of this non-randomized interventional trial.

## 453 **Conclusions**

454 While this study provides additional evidence of the efficacy of the Sawyer PointONE® filter in a novel  
455 context (urban informal settlement), future controlled trials are needed to isolate and attribute causality to  
456 the filter. Furthermore, additional studies are needed which further validate the use of self-reported health  
457 measures, a single respondent from the household, and the potential impact of a combined  
458 health/evangelism approach. In practice, we strongly recommend that water quality testing, including  
459 dissolved metals and other potential contaminants, is needed to ensure that intervention choice is targeted  
460 to the water issues of the household. Finally, there is a desperate need for long term studies of point of use  
461 filter utilization, filter cleaning compliance and long-term health effects. The observed length of the

462 present study is hindered by a rather short (90-day) follow-up period. However, this lack of research on  
463 continued adoption of water intervention technologies and practices is an industry-wide problem. Without  
464 such studies that specifically focus on the long-term effects of filter systems and hygiene interventions,  
465 there is a lack of knowledge of whether or not the devices are providing consistent and reliable access to  
466 safe drinking water (26,27).

## 467 **Abbreviations**

468 CBT EC + TC (Compartment Bag Test)

469 Most Probable Number (MPN)

470 Point-of-Collection (PoC)

471 Point-of-Entry (PoE)

472 Point-of-Use (PoU)

473 The Bucket Ministry (TBM)

474 Water, sanitation, and hygiene (WASH)

475 World Health Organization (WHO)

## 476 **Declarations**

477 *Ethics approval and consent to participate:* Data collection procedures were approved by the Institutional  
478 Review Board at Dordt University (a federally compliant IRB: FWA00028884), by contract. All  
479 participants included in this manuscript consented to participate.

480 *Consent for publication:* All participants consented for de-identified, summary data to be published.

481 *Availability of data and materials:* Summary and/or de-identified data is available from the corresponding  
482 author ([ntintle@uic.edu](mailto:ntintle@uic.edu)) upon reasonable request.

483 *Competing interests:* Portions of the authors' time (NT, JW, KDVG, BPK, VB and AAB) were supported  
484 by a grant from Sawyer Products, Inc.

485 *Funding:* Portions of the authors' time (NT, JW, KDVG, BPK, VB and AAB) were supported by a grant  
486 from Sawyer Products, Inc.

487 *Authors' contributions:* NT, KDVG, BPK and AAB conceived of the study. NT and AAB drafted the  
488 bulk of the final manuscript, with GKG, KVDG and BPK providing substantive revisions. JW and NT led  
489 and implemented statistical analyses. VB and MW provided important context, data interpretation and  
490 literature review. BNT, ND, LD, MM, MO, LSc, LSn and DW processed water quality kits. BNT, CI and  
491 MM performed sequencing. NLH processed metals testing data. GKG executed revision of the  
492 manuscript. All authors read and approved the final manuscript.

493 *Acknowledgments:* None.

## 494 **References**

- 495 1. Troeger C, Blacker BF, Khalil IA, Rao PC, Cao S, Zimsen SR, et al. Estimates of the global,  
496 regional, and national morbidity, mortality, and aetiologies of diarrhoea in 195 countries: a  
497 systematic analysis for the Global Burden of Disease Study 2016. *Lancet Infect Dis.*  
498 2018;18(11):1211–28.
- 499 2. Pruss-Ustun A, Bartram J, Clasen T, Colford JMJ, Cumming O, Curtis V, et al. Burden of disease  
500 from inadequate water, sanitation and hygiene in low- and middle-income settings: a retrospective  
501 analysis of data from 145 countries. *Trop Med Int Health.* 2014 Aug;19(8):894–905.
- 502 3. Organization WH. Diarrhoeal disease [Internet]; 2017. Available from: [https://www.who.int/news-](https://www.who.int/news-room/fact-sheets/detail/diarrhoeal-disease)  
503 [room/fact-sheets/detail/diarrhoeal-disease](https://www.who.int/news-room/fact-sheets/detail/diarrhoeal-disease). Accessed 16 July 2020.

- 504 4. Prüss A, Kay D, Fewtrell L, Bartram J. Estimating the Burden of Disease from Water , Sanitation ,  
505 and Hygiene at a Global Level. 2002;110(5).
- 506 5. Thomas JC, Weber DJ. Epidemiologic Methods for the Study of Infectious Disease. 1st ed. Oxford  
507 University Press; 2001.
- 508 6. Sack RB. Bacterial and Parasitic Agents of Acute Diarrhea. In: Bellanti JA, editor. Acute  
509 Diarrhea: Its Nutritional Consequences in Children. New York, NY: Vevey/Raven Press; 1983. p.  
510 53–65.
- 511 7. UN-Water GLAAS 2017: Financing universal water, sanitation and hygiene under the Sustainable  
512 Development Goals | UN-Water [Internet]. Available from:  
513 [https://www.unwater.org/publications/un-water-glaas-2017-financing-universal-water-sanitation-](https://www.unwater.org/publications/un-water-glaas-2017-financing-universal-water-sanitation-and-hygiene-under-sustainable)  
514 [and-hygiene-under-sustainable](https://www.unwater.org/publications/un-water-glaas-2017-financing-universal-water-sanitation-and-hygiene-under-sustainable). Accessed 26 Feb 2023.
- 515 8. UN-Water GLAAS 2022: strong systems and sound investments - Evidence on and key insights  
516 into accelerating progress on sanitation, drinking-water and hygiene | UN-Water [Internet].  
517 Available from: [https://www.unwater.org/publications/un-water-glaas-2022-strong-systems-and-](https://www.unwater.org/publications/un-water-glaas-2022-strong-systems-and-sound-investments-evidence-and-key-insights)  
518 [sound-investments-evidence-and-key-insights](https://www.unwater.org/publications/un-water-glaas-2022-strong-systems-and-sound-investments-evidence-and-key-insights). Accessed 26 Feb 2023.
- 519 9. UNDP Water Governance Facility/UNICEF. WASH and Accountability: explaining the concept.  
520 Stockholm and New York; 2015.
- 521 10. Clasen T, Schmidt WP, Rabie T, Roberts I, Cairncross S. Interventions to improve water quality  
522 for preventing diarrhoea: systematic review and meta-analysis. BMJ [Internet]. 2007 Apr 14;  
523 334(7597):782–5. Available from: <https://pubmed.ncbi.nlm.nih.gov/17353208/>. Accessed 26 Feb  
524 2023
- 525 11. Wilner L, Wells E, Ritter M, Casimir JM, Chui K, Lantagne D. Sustained use in a relief-to-  
526 recovery household water chlorination program in Haiti: comparing external evaluation findings



- 527 with internal supervisor and community health worker monitoring data. *Journal of Water*  
528 *Sanitation and Hygiene for Development*. 2017 Mar 1;7(1):56–66.
- 529 12. LLC H. Microbiological Testing of the Sawyer 7/6B Filter. Report No. S05-03. 2005.
- 530 13. Tintle N, Heynen A, Van De Griend K, Ulrich R, Ojo M, Boven E, et al. Evaluating the efficacy  
531 of point-of-use water filtration units in Fiji. *Trop Med Health*. 2019; 47:48.
- 532 14. Kohlitz J, Hasan T, Khatri K, Sokota A, Iddings S, Bera U PR. Assessing reported use and  
533 microbiological performance of a point-of-use household water filter in rural Fiji. *Journal of*  
534 *Water, Sanitation and Hygiene for Development*. 2013;3(207–215).
- 535 15. Murray A, Goeb M, Stewart B, Hopper C, Peck J, Meub C, et al. Fouling in hollow fiber  
536 membrane micro filters used for household water treatment. 2015;220–8.
- 537 16. Lindquist EED, Norman WR, Soerens TS. A review of: Fouling in hollow fiber membrane  
538 microfilters used for household water treatment. *Journal of Water, Sanitation and Hygiene for*  
539 *Development*. 2015;5(229).
- 540 17. Murray AL, Stewart B, Hopper C, Tobin E, Rivera J, Mut-tracy H, et al. Laboratory efficacy and  
541 field effectiveness of hollow fiber membrane microfilters used for household water treatment in  
542 Honduras. 2017;74–84.
- 543 18. UN Habitat. Informal settlements’ vulnerability mapping in Kenya: The case of Kibera.  
544 [https://unhabitat.org/sites/default/files/2021/08/the\\_case\\_of\\_kibera\\_edited.pdf](https://unhabitat.org/sites/default/files/2021/08/the_case_of_kibera_edited.pdf); 2020. Accessed  
545 Feb 2023.
- 546 19. Sawyer Point One. <https://www.sawyer.com/products/international-bucket-system>. Accessed Feb  
547 2023.
- 548 20. [https://www.aquagenx.com/wp-content/uploads/2022/06/MPN-CBT-ECTC-Instructions-](https://www.aquagenx.com/wp-content/uploads/2022/06/MPN-CBT-ECTC-Instructions-DrinkingWater-20220513.pdf)  
549 [DrinkingWater-20220513.pdf](https://www.aquagenx.com/wp-content/uploads/2022/06/MPN-CBT-ECTC-Instructions-DrinkingWater-20220513.pdf). Accessed Feb 2023.

- 550 21. Tintle N, Heynen A, van de Griend K, Ulrich R, Ojo M, Boven E, et al. Evaluating the efficacy of  
551 point-of-use water filtration units in Fiji. *Trop Med Health* [Internet]. 2019 Aug 7; 47(1).  
552 Available from: <https://pubmed.ncbi.nlm.nih.gov/31410085/>. Accessed 26 Feb 2023.
- 553 22. [https://github.com/SchlossLab/MiSeq\\_WetLab\\_SOP/blob/master/MiSeq\\_WetLab\\_SOP.md](https://github.com/SchlossLab/MiSeq_WetLab_SOP/blob/master/MiSeq_WetLab_SOP.md).  
554 Accessed Feb 2023.
- 555 23. [https://mothur.org/wiki/miseq\\_sop/](https://mothur.org/wiki/miseq_sop/). Accessed Feb 2023.
- 556 24. [www.r-project.org](http://www.r-project.org). Accessed Feb 2023.
- 557 25. World Health Organization. Guidelines for drinking water quality. Fourth. Vol. Chapter 11.  
558 Geneva: [https://www.who.int/water\\_sanitation\\_health/publications/gdwq4-with-add1-](https://www.who.int/water_sanitation_health/publications/gdwq4-with-add1-chap11.pdf?ua=1)  
559 [chap11.pdf?ua=1](https://www.who.int/water_sanitation_health/publications/gdwq4-with-add1-chap11.pdf?ua=1); 2017. 231–306 p.
- 560 26. Bradshaw A, Mugabo L, Gebremariam A, Thomas E, Macdonald L. Integration of Household  
561 Water Filters with Community-Based Sanitation and Hygiene Promotion—A Process Evaluation  
562 and Assessment of Use among Households in Rwanda. *Sustainability* 2021, Vol 13, Page 1615  
563 [Internet]. 2021 Feb 3; 13(4):1615. Available from: [https://www.mdpi.com/2071-](https://www.mdpi.com/2071-1050/13/4/1615/htm)  
564 [1050/13/4/1615/htm](https://www.mdpi.com/2071-1050/13/4/1615/htm). Accessed 26 Feb 2023.
- 565 27. Brown J, Sobsey MD, Loomis D. Local drinking water filters reduce diarrheal disease in  
566 Cambodia: A randomized, controlled trial of the ceramic water purifier. *American Journal of*  
567 *Tropical Medicine and Hygiene*. 2008;79(3):394–400.
- 568

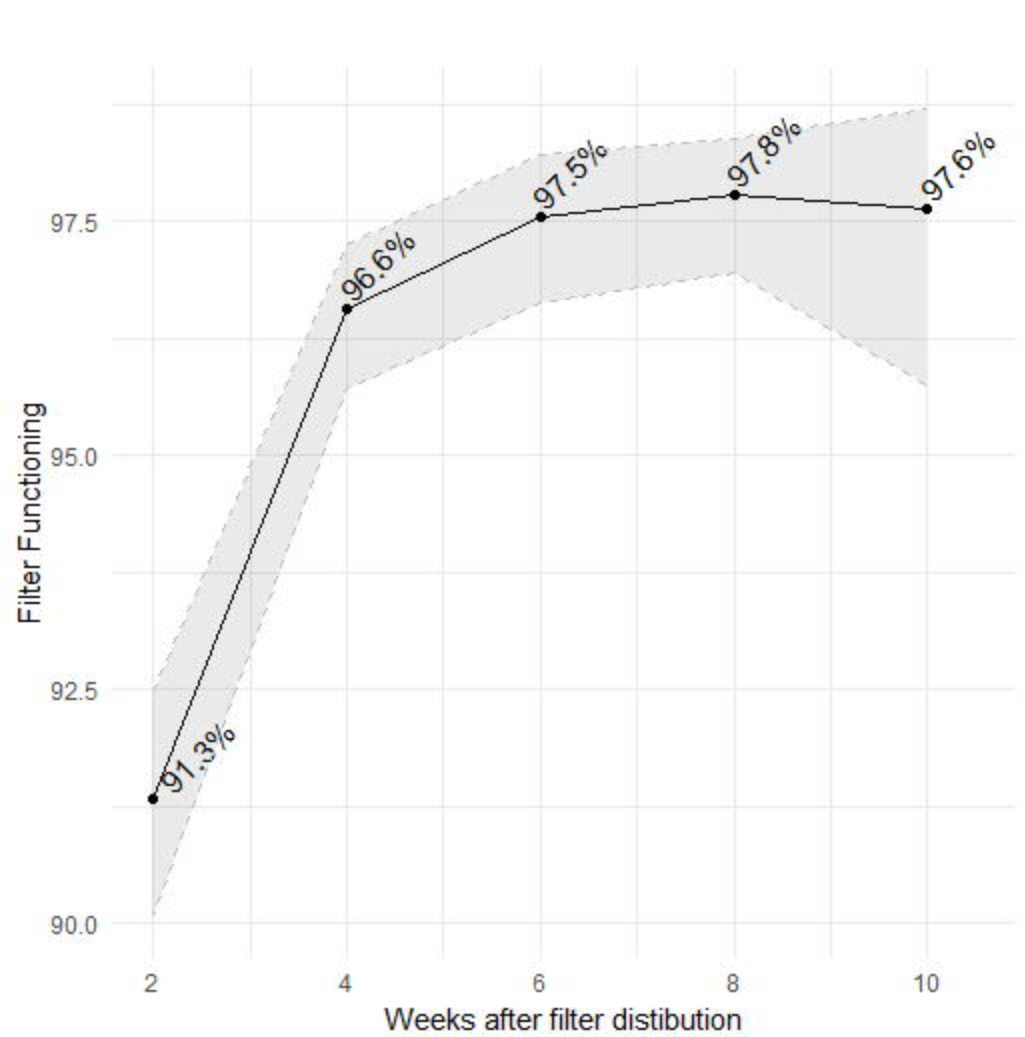

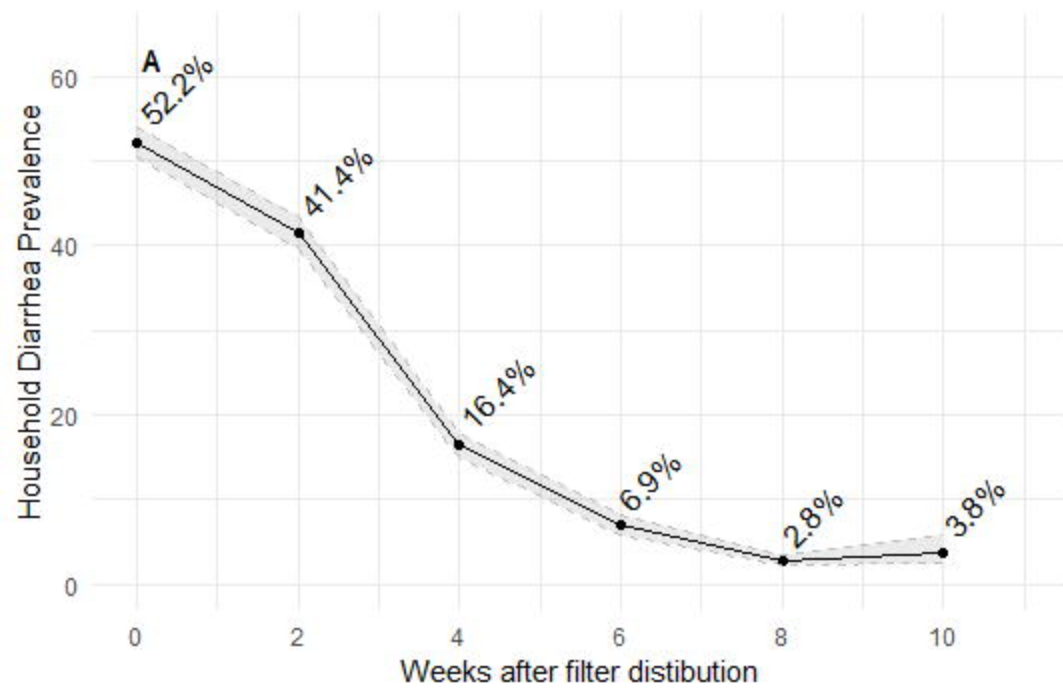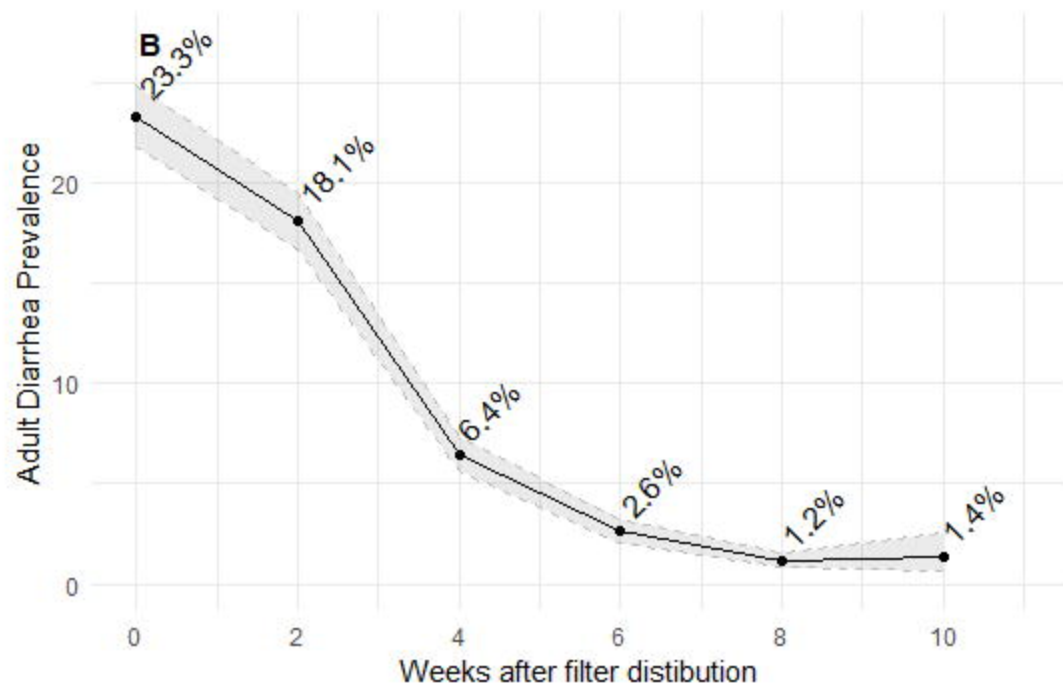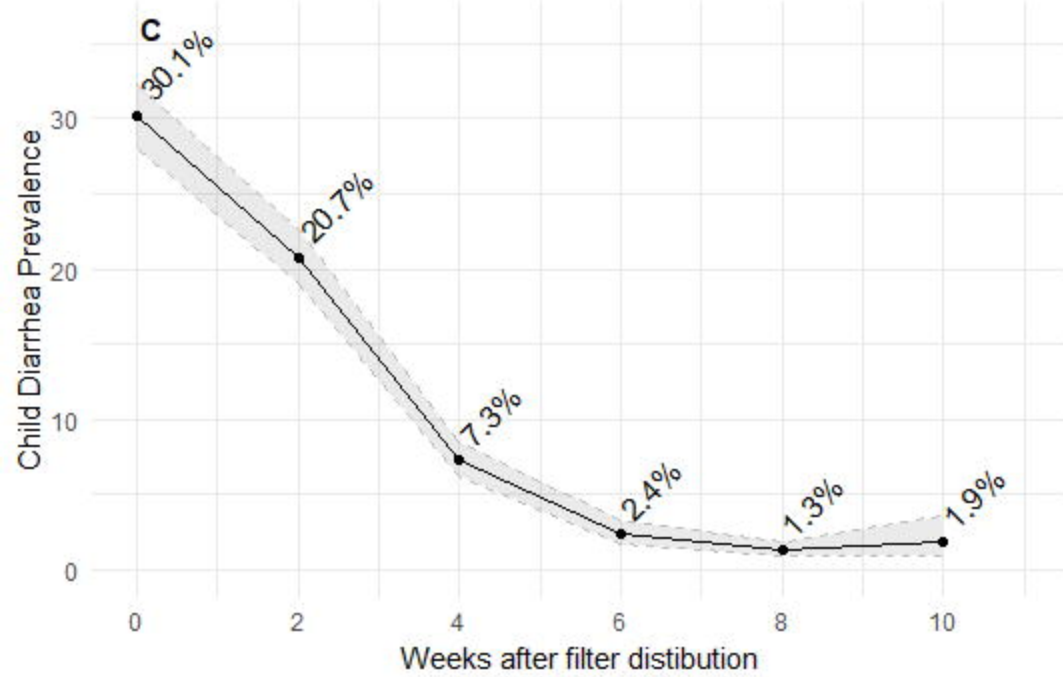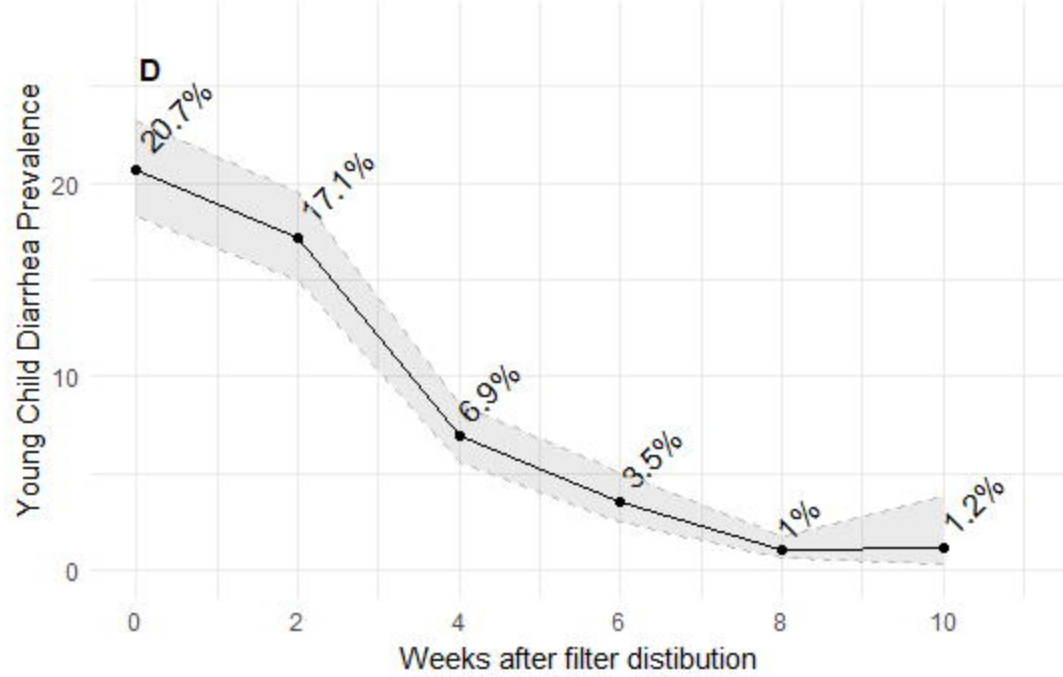

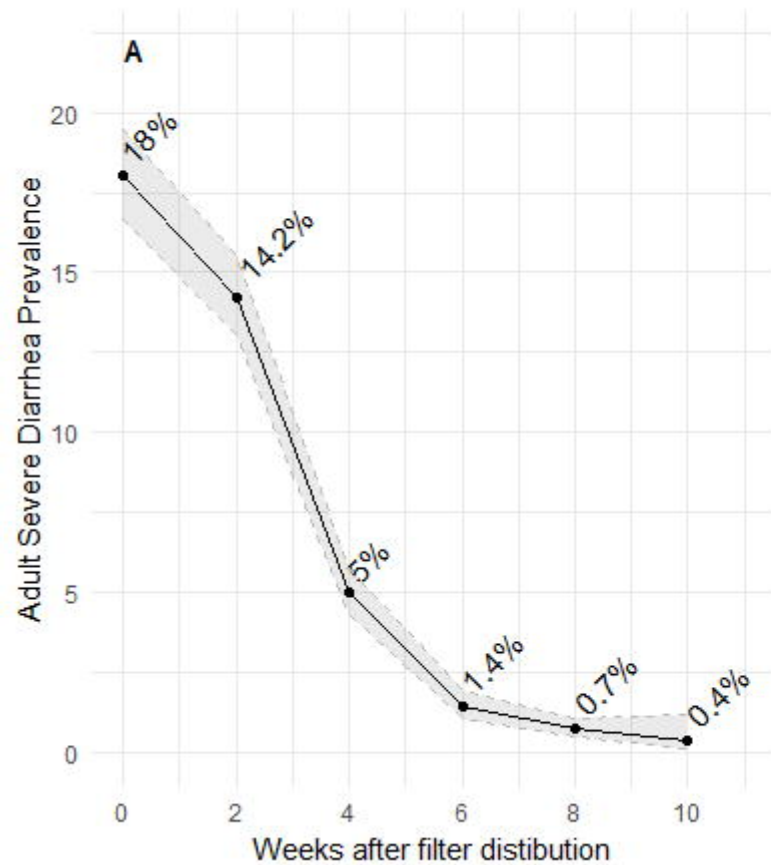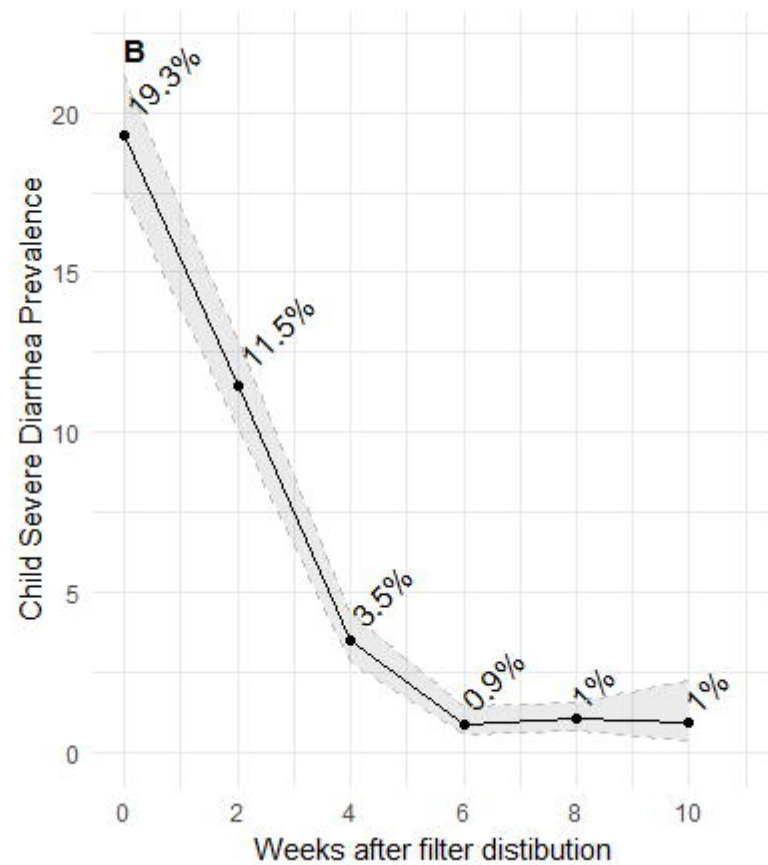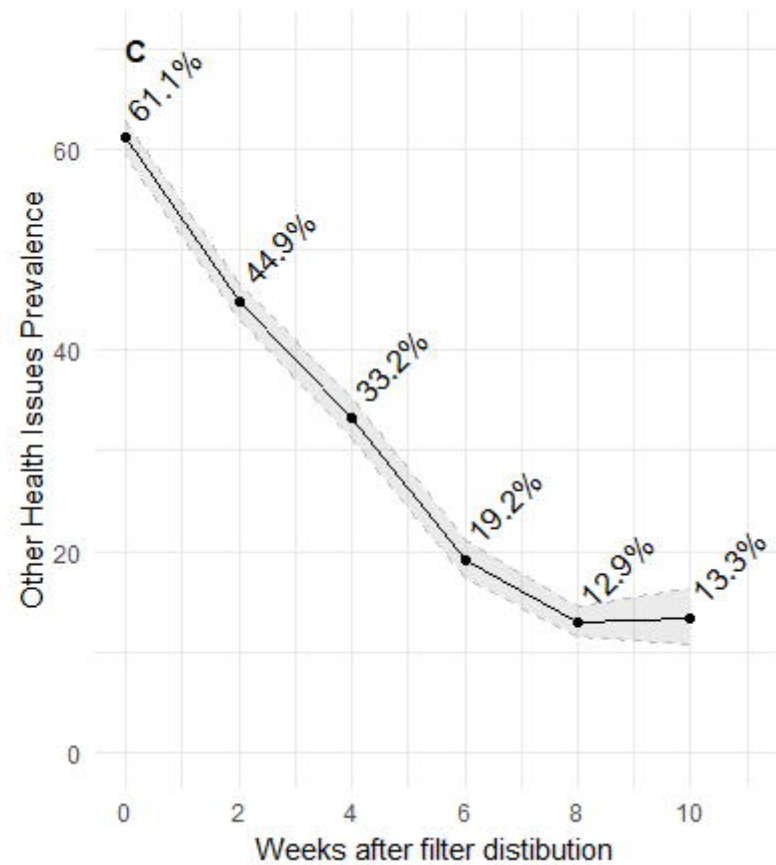

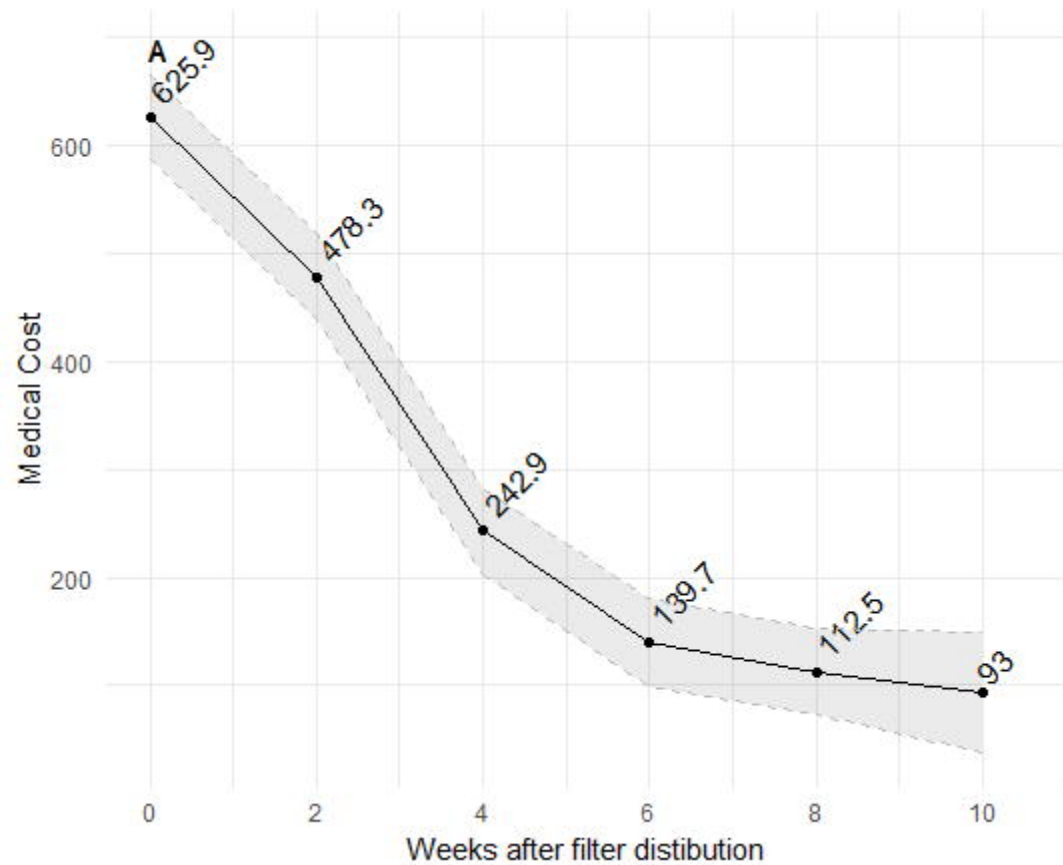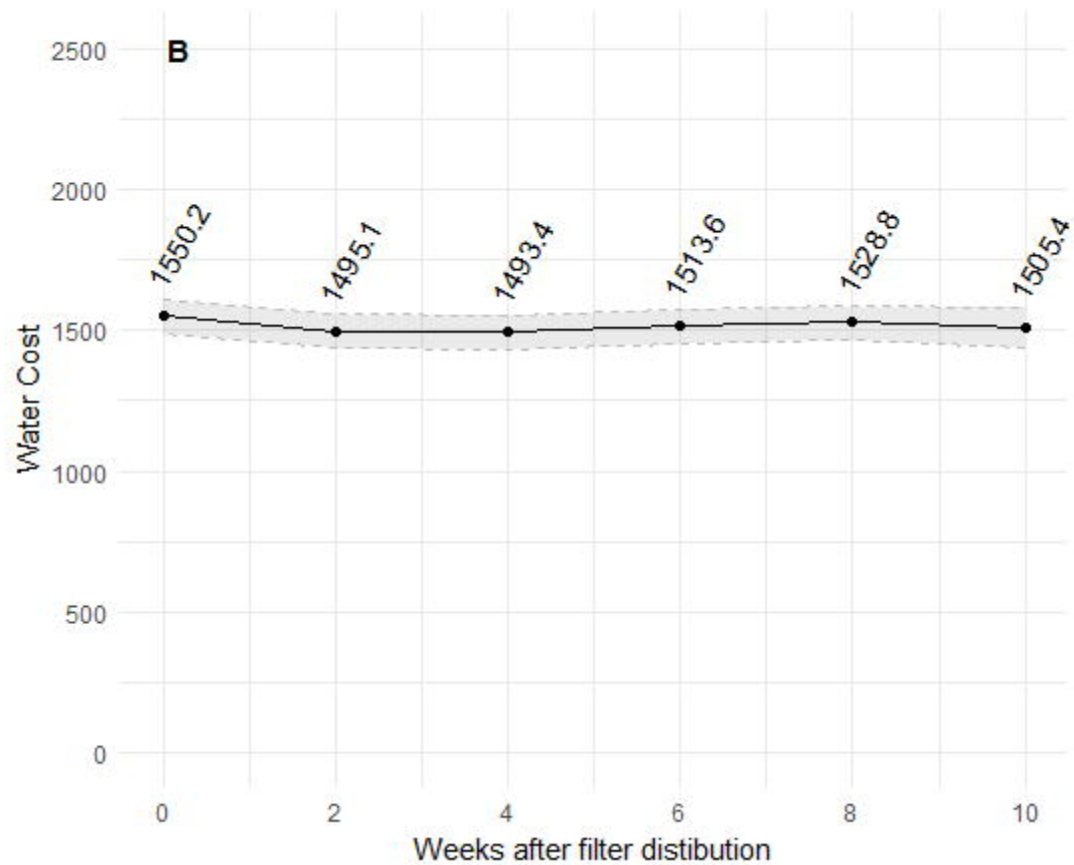

Received antiparasitic medication No Yes

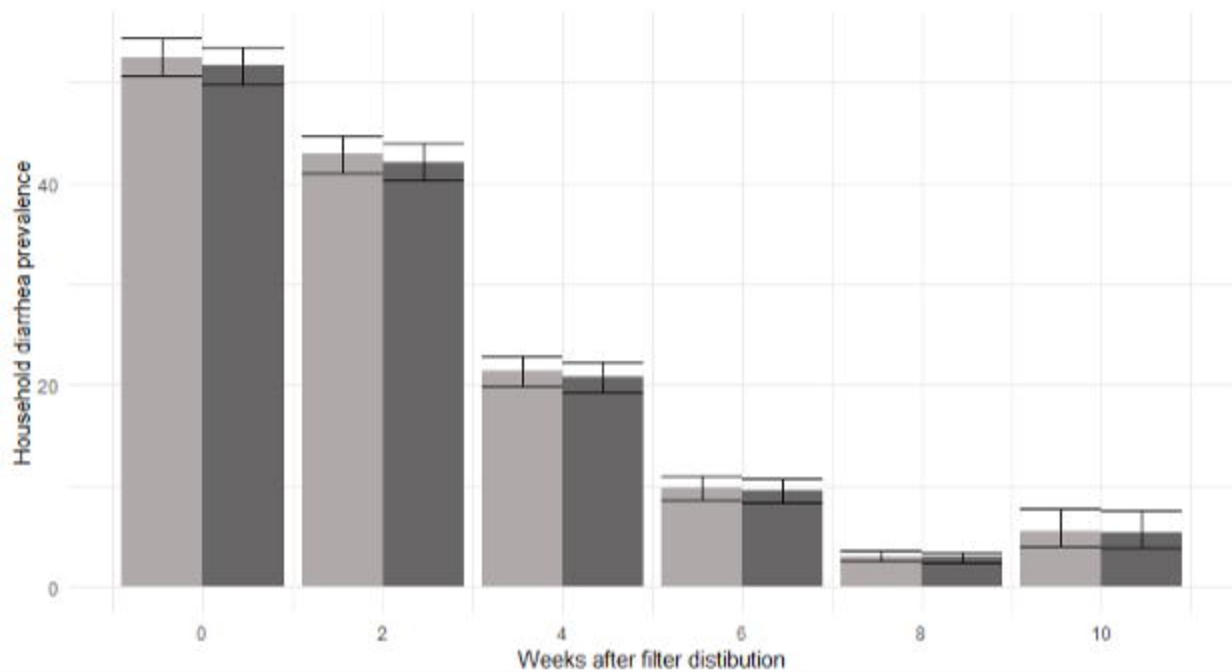

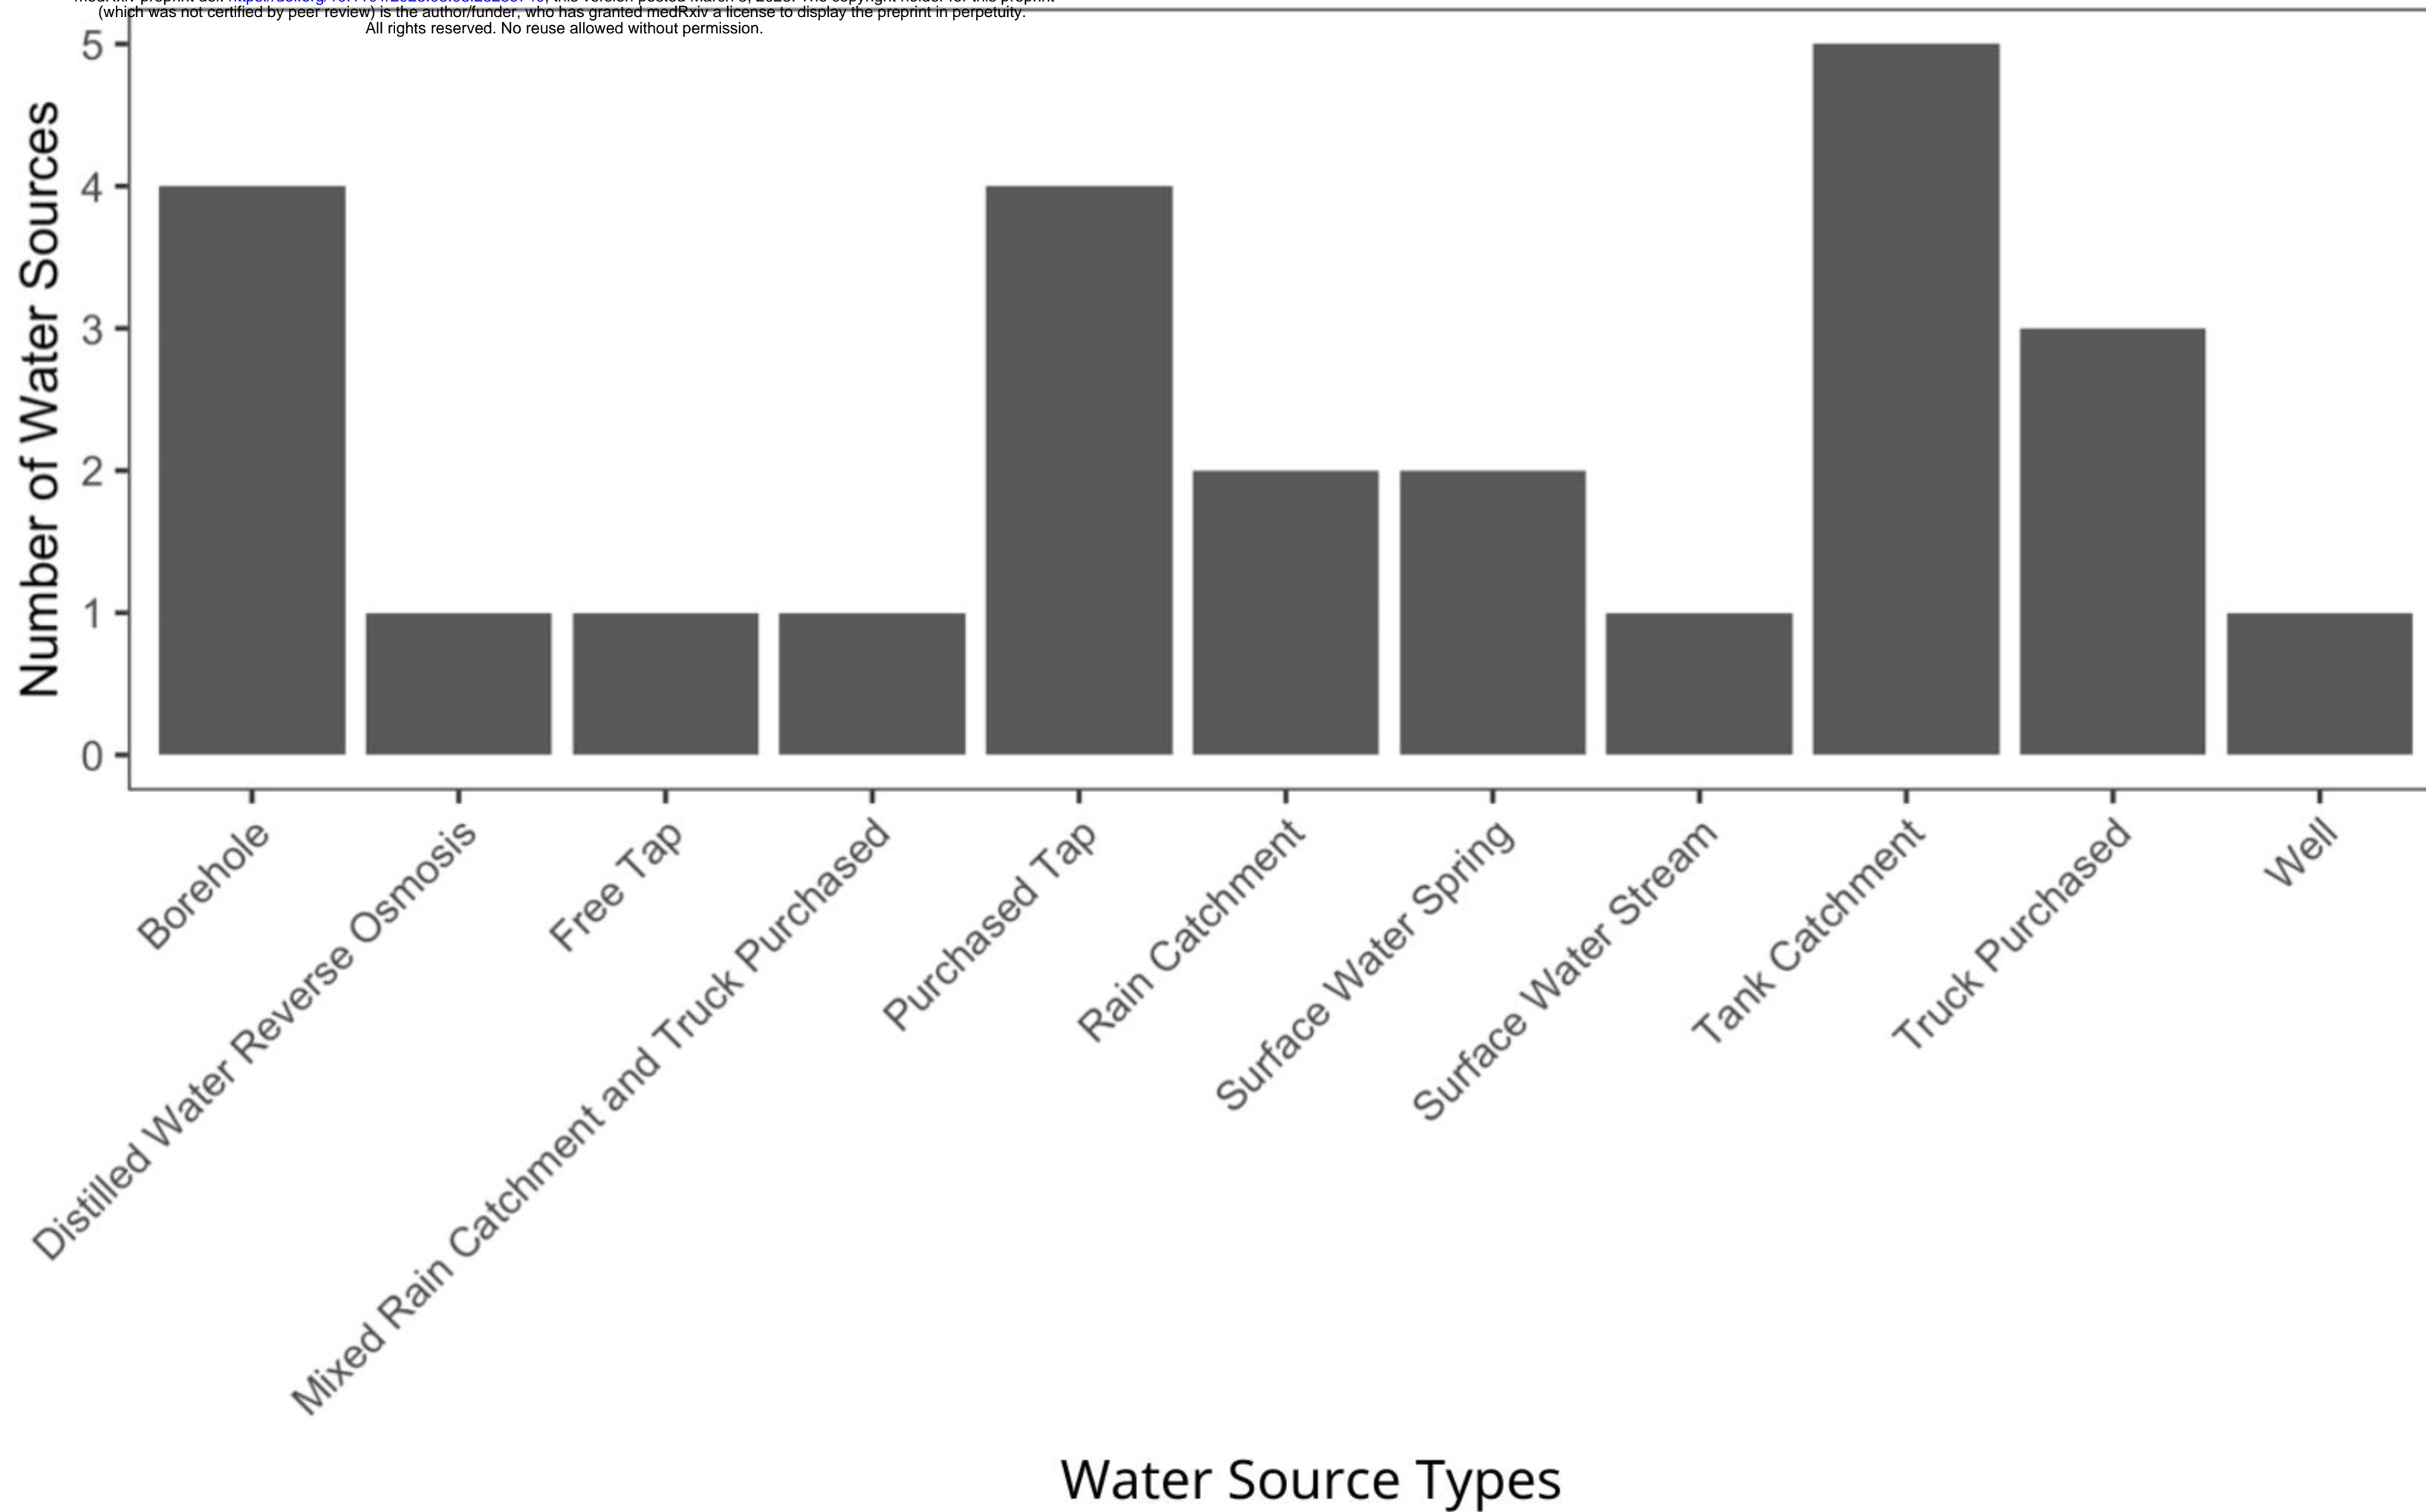



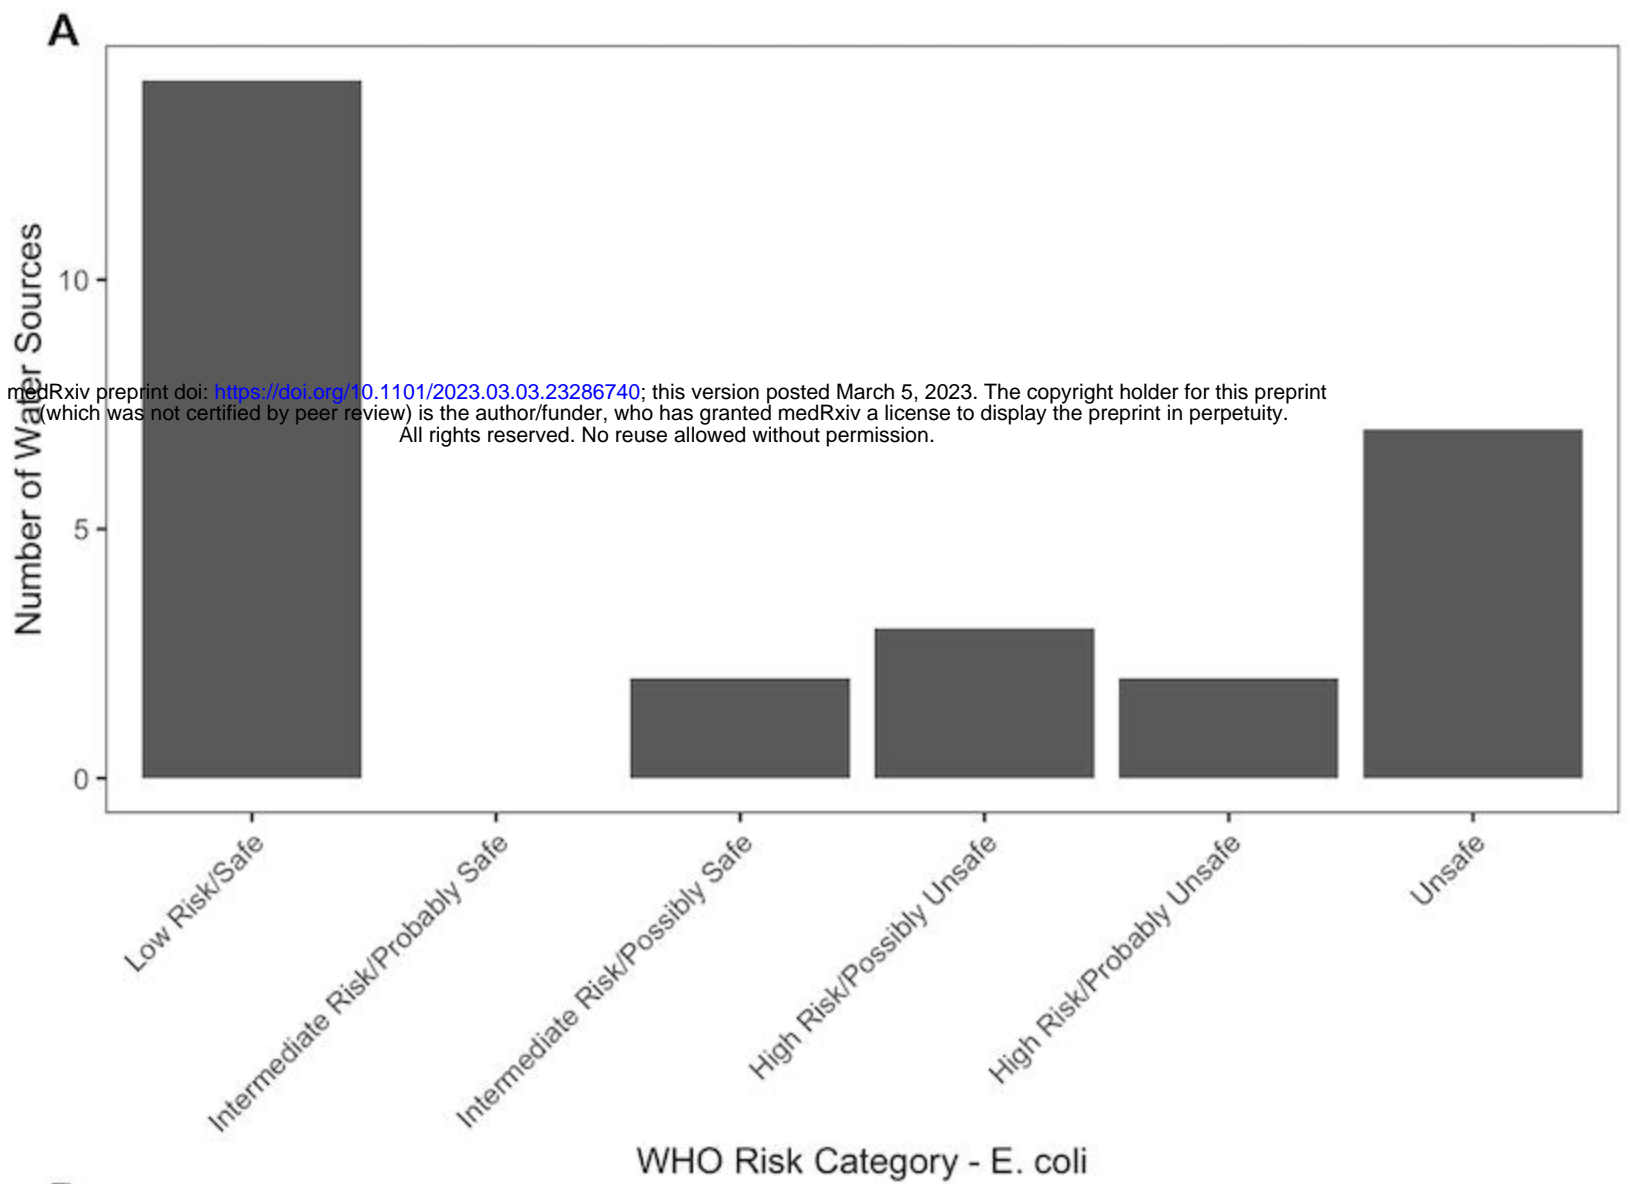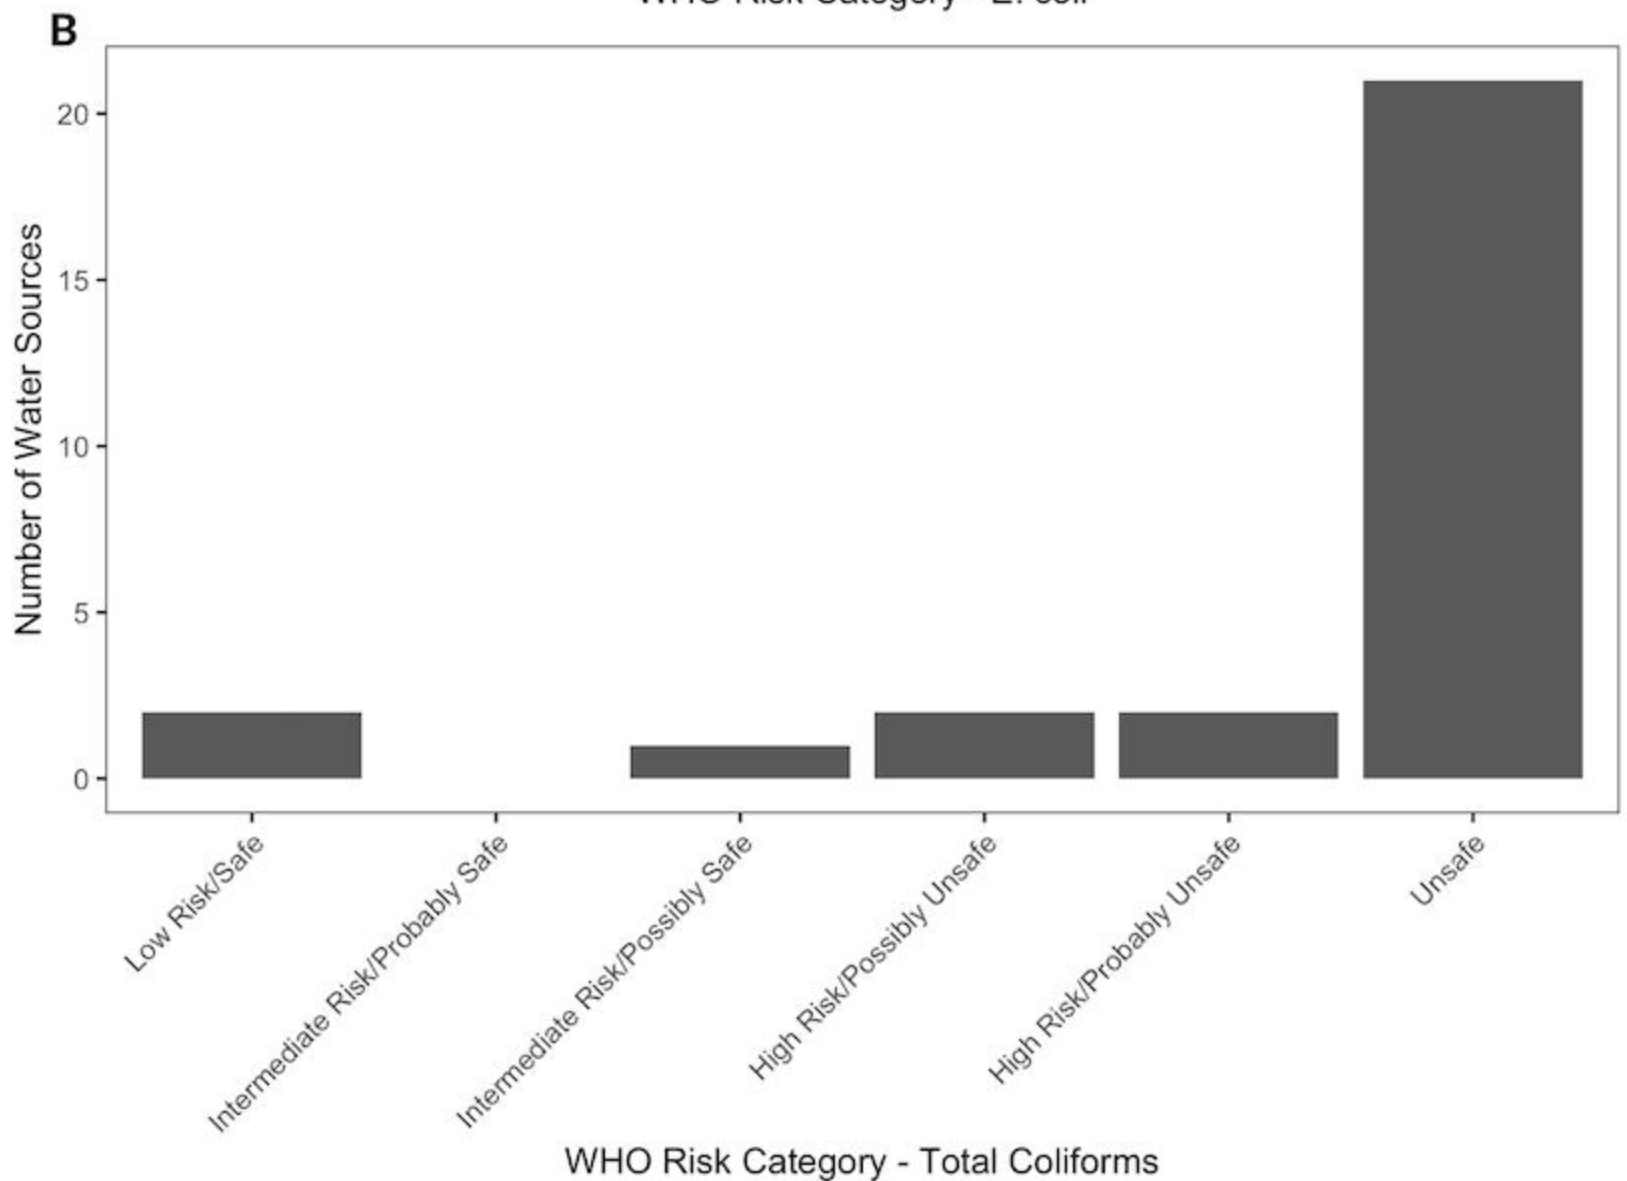

Source: https://medrxiv.org/content/10.1101/2023.03.03.23286740v1.full.pdf
